# Supplementary material for: Causal associations between cardiorespiratory fitness and type 2 diabetes
Source: PubMed Central journal article supplement (PMC10318084; doi:10.1038/s41467-023-38234-w), 2023-07-03
Supplement: 41467_2023_38234_MOESM3_ESM.pdf [file 41467_2023_38234_MOESM3_ESM.pdf]

## **Description of Additional Supplementary Files**

File Name: Supplementary Data 1

Description: List of 160 variants included in the enhanced genetic risk score for fitness and effect sizes from genome-wide association analyses of fitness in UK Biobank (N=69,416).
